# Supplementary material
Source: PubMed Central journal article supplement (PMC6204197)

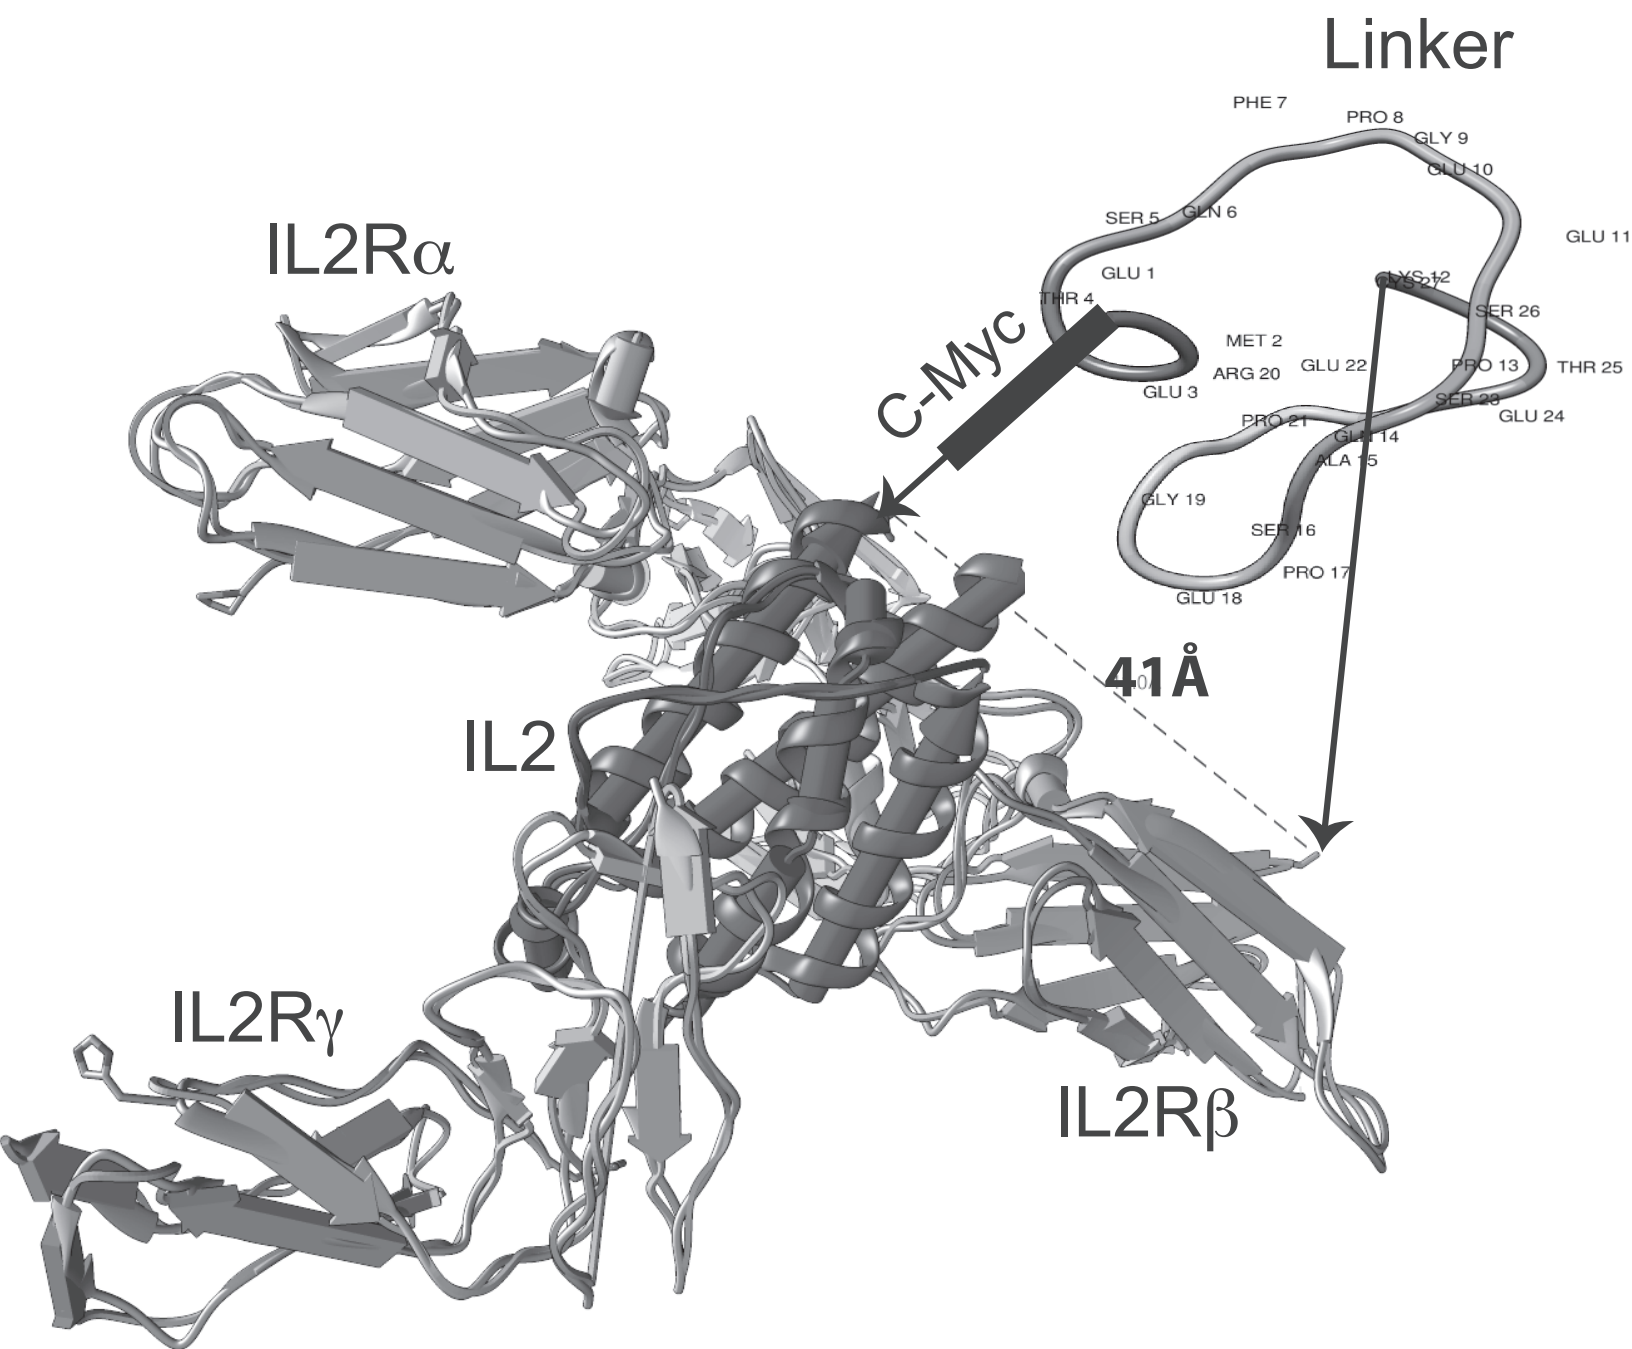

Fig. S1

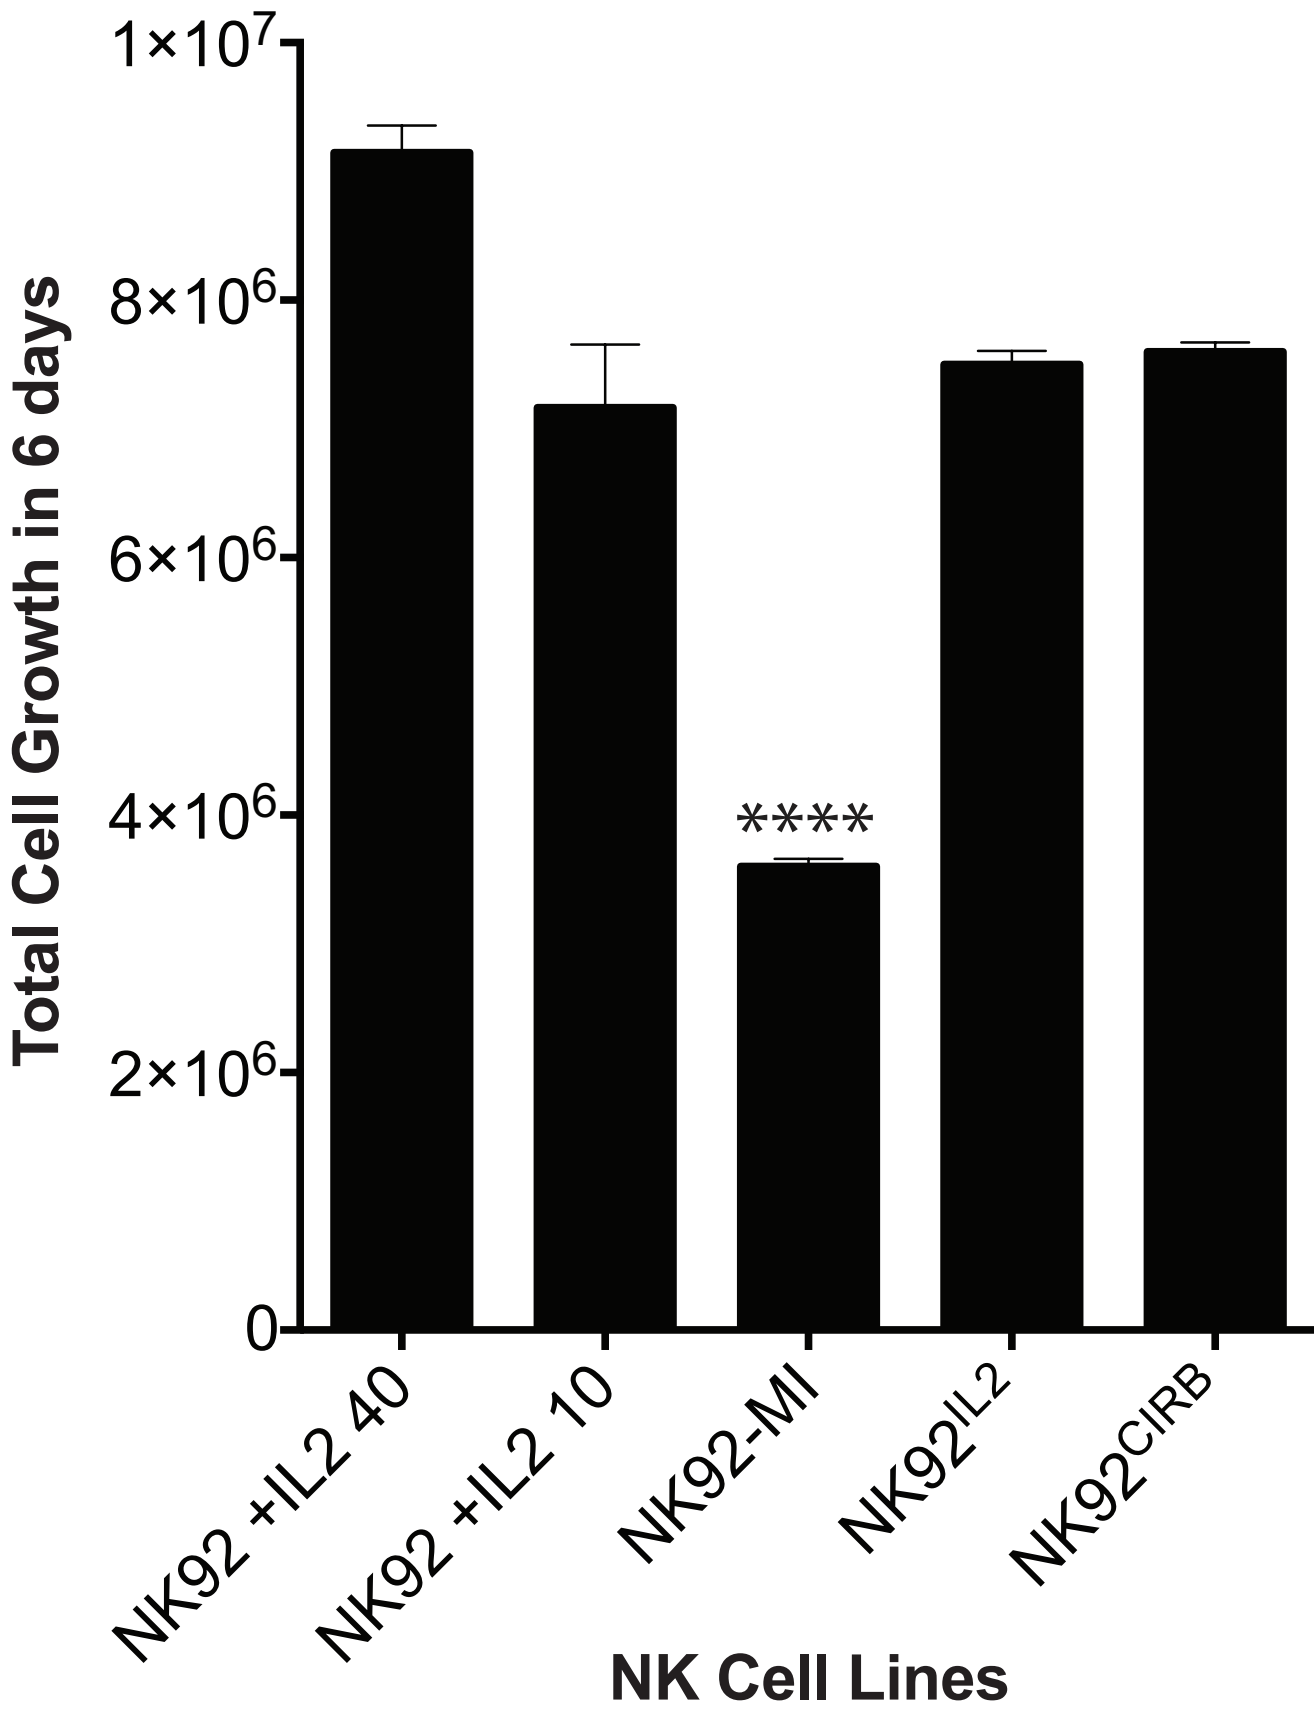

**Fig.S2**

Supplement: NIHMS989216-supplement-1.pdf [file NIHMS989216-supplement-1.pdf]
